# Supplementary material for: High performance PEDOT/lignin biopolymer composites for electrochemical supercapacitors
Source: Royal Society of Chemistry journal article supplement (doi:10.1039/c5ta10096h), 2016-01-01
Supplement: c5ta10096h1.pdf [file c5ta10096h1.pdf]

Supplementary Information for

**High performance PEDOT/Lignin biopolymer composites for  
electrochemical supercapacitors**

F. N. Ajjan,<sup>§a</sup> N. Casado,<sup>§b</sup> T. Rębiś,<sup>a</sup> A. Elfving,<sup>a</sup> N. Solin,<sup>a</sup> D. Mecerreyes<sup>\*bc</sup> and O. Inganäs<sup>\*a</sup>

<sup>a</sup> F.N. Ajjan, T. Rębiś, A. Elfving, N. Solin, Prof. O. Inganäs

Biomolecular and organic electronics

IFM, Linköping University

S-581 83, Linköping, Sweden

E-mail: fataj@ifm.liu.se.com; [oling@ifm.liu.se](mailto:oling@ifm.liu.se)

<sup>b</sup> N. Casado, D. Mecerreyes

POLYMAT, University of the Basque Country UPV/EHU, Joxe Mari Korta Center, Avda. Tolosa 72, 20018 Donostia-San Sebastian, Spain

E-mail: david.mecerreyes@ehu.es

<sup>c</sup> D. Mecerreyes

IKERBASQUE, Basque Foundation for Science, E-48011, Bilbao, Spain

**Figures**

**Lignin quantification**

Calibration curve of lignin was obtained by measuring the absorbance of different lignin standards with concentrations between 0.0025 and 0.020 g/L, as shown in Figure S1. A significant correlation between the absorption and lignin concentrations was obtained on the concentration range of lignin tested.

The measured absorbance at 202 nm of PEDOT/Lig dispersions was used with the calibration curve to calculate final lignin concentration on the dispersions. As a result, final PEDOT/Lig ratio was calculated.

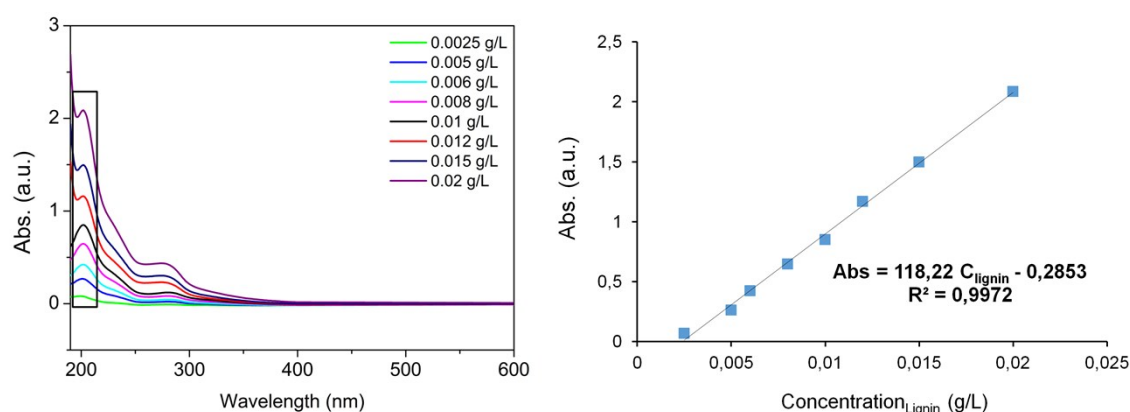

Figure S1. Calibration curve of lignin at 202 nm wavelength.

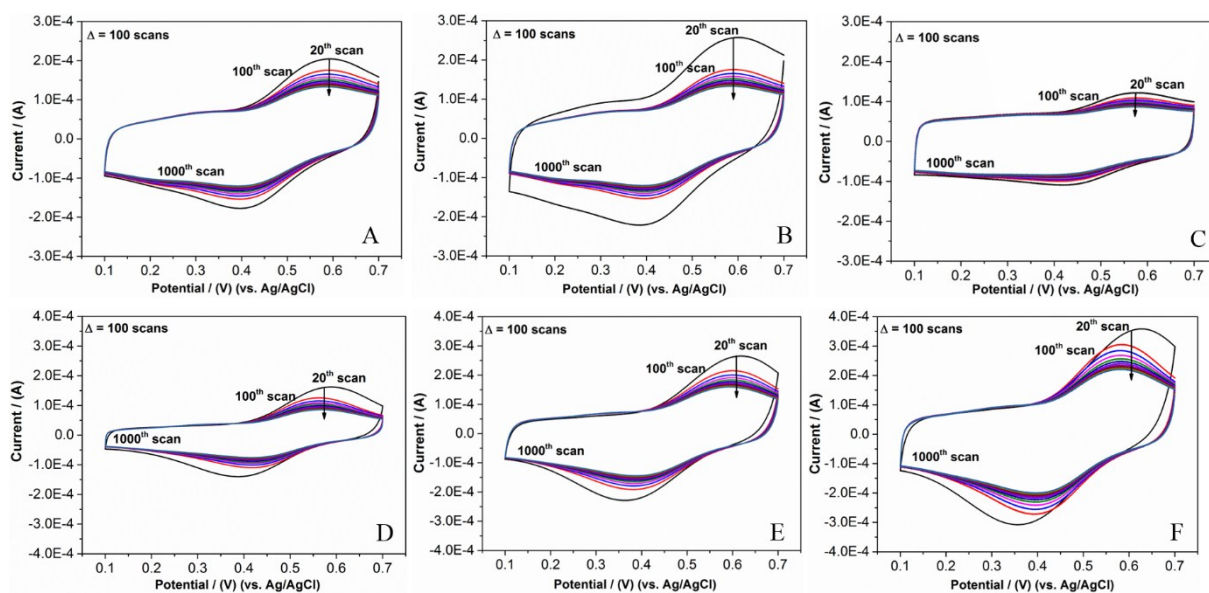

Figure S2. Cyclic voltammograms of PEDOT/Lig composites: chemically polymerized (A) 3:2, (B) 7:4, (C) 6:1 and electrochemically polymerized (D) 300 s, (E) 600 s, (F) 900 s.

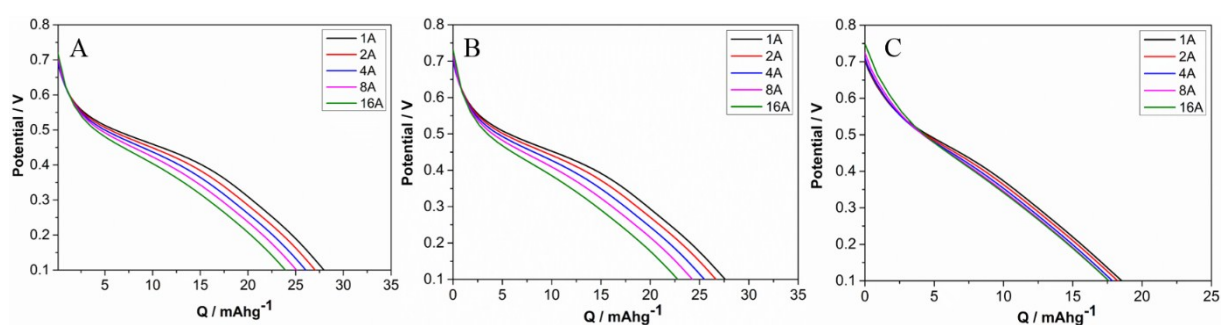

Figure S3. Discharge curves of PEDOT/Lig composites (A) 3:2, (B) 7:4, (C) 6:1 at different currents.

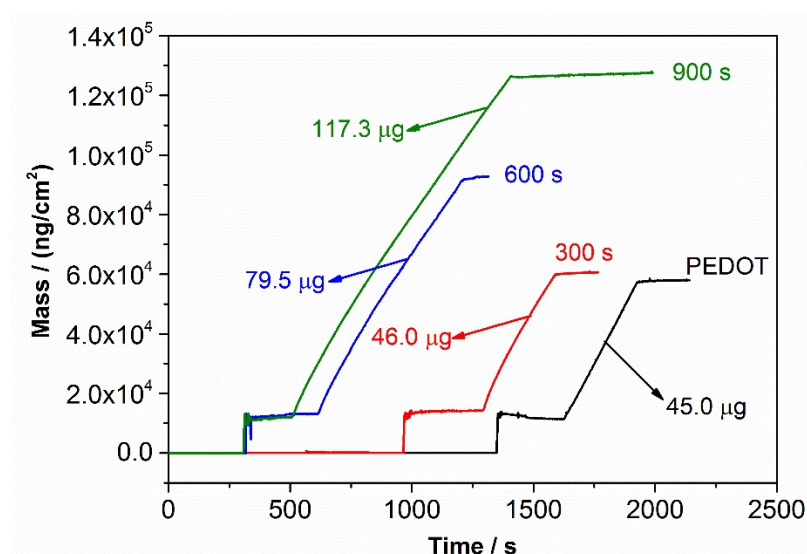

Figure S4. Mass changes obtained for the electrochemical polymerized PEDOT/Lig composites and PEDOT.

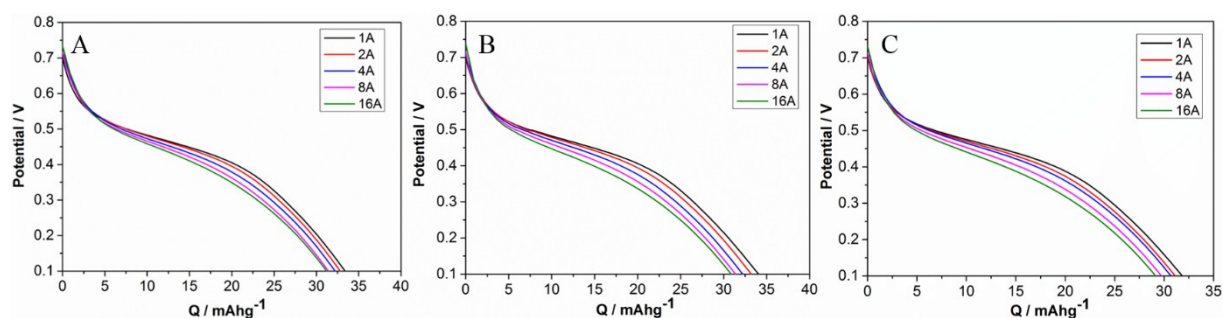

Figure S5. Discharge curves of PEDOT/Lig composites (A) 300 s, (B) 600 s, (C) 900 s at different currents.

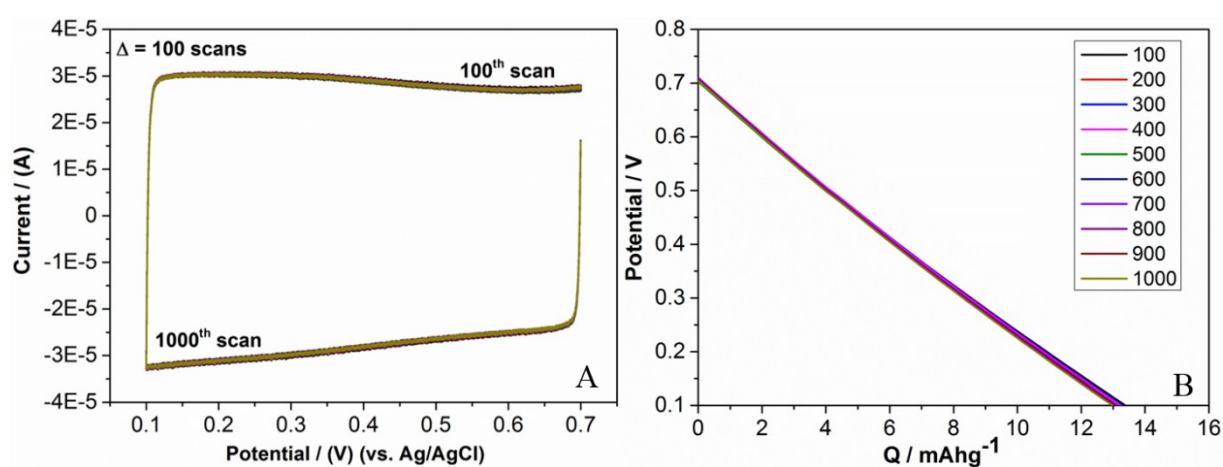

Figure S6. (A) Cyclic stability and (B) corresponding discharge curves of PEDOT.

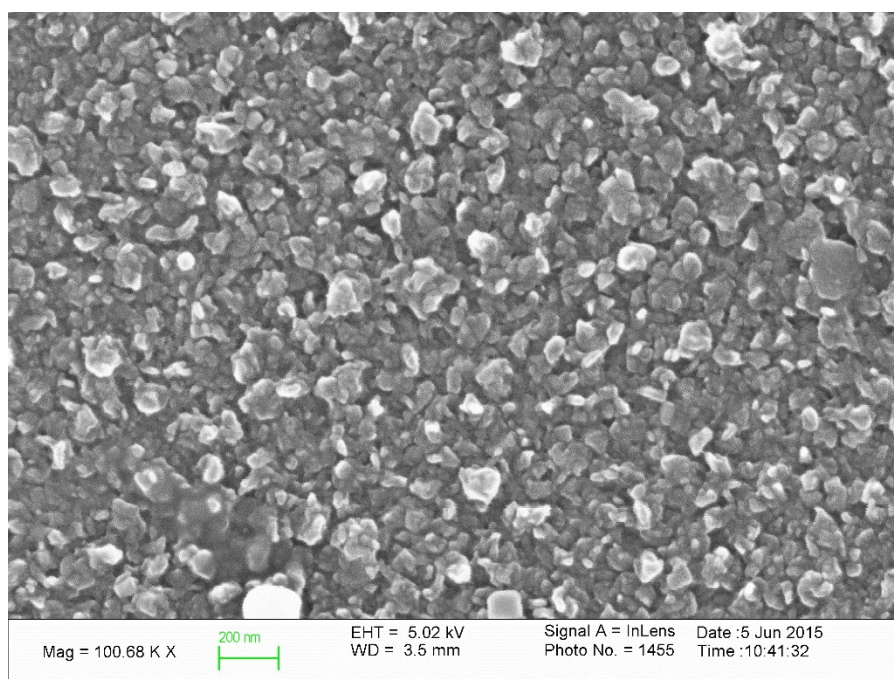

Figure S7. SEM image of PEDOT.



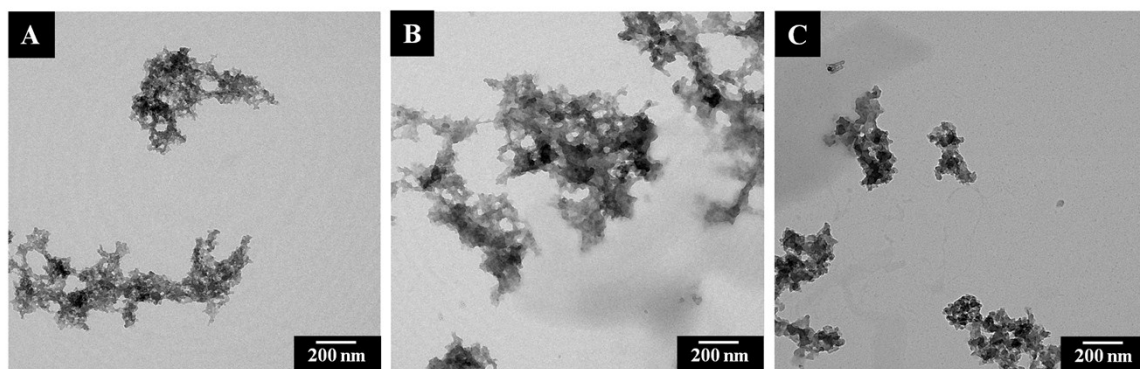

Figure S8. TEM images of PEDOT/Lignin composites chemically polymerized with the following EDOT:Lignin mass ratios (a) 3:2; (b) 7:4; (c) 6:1.

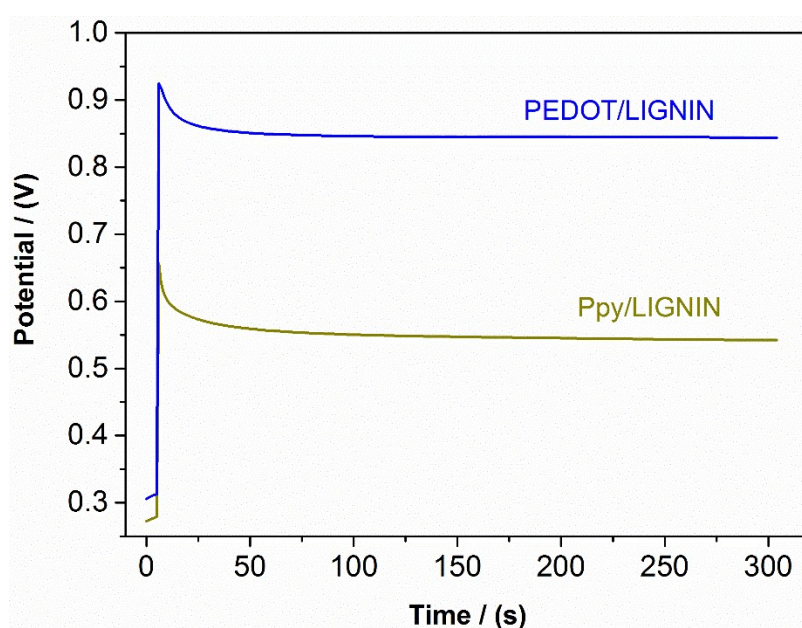

Figure S9. Galvanostatic electrochemical polymerization of PEDOT/Lig and Ppy/Lig.

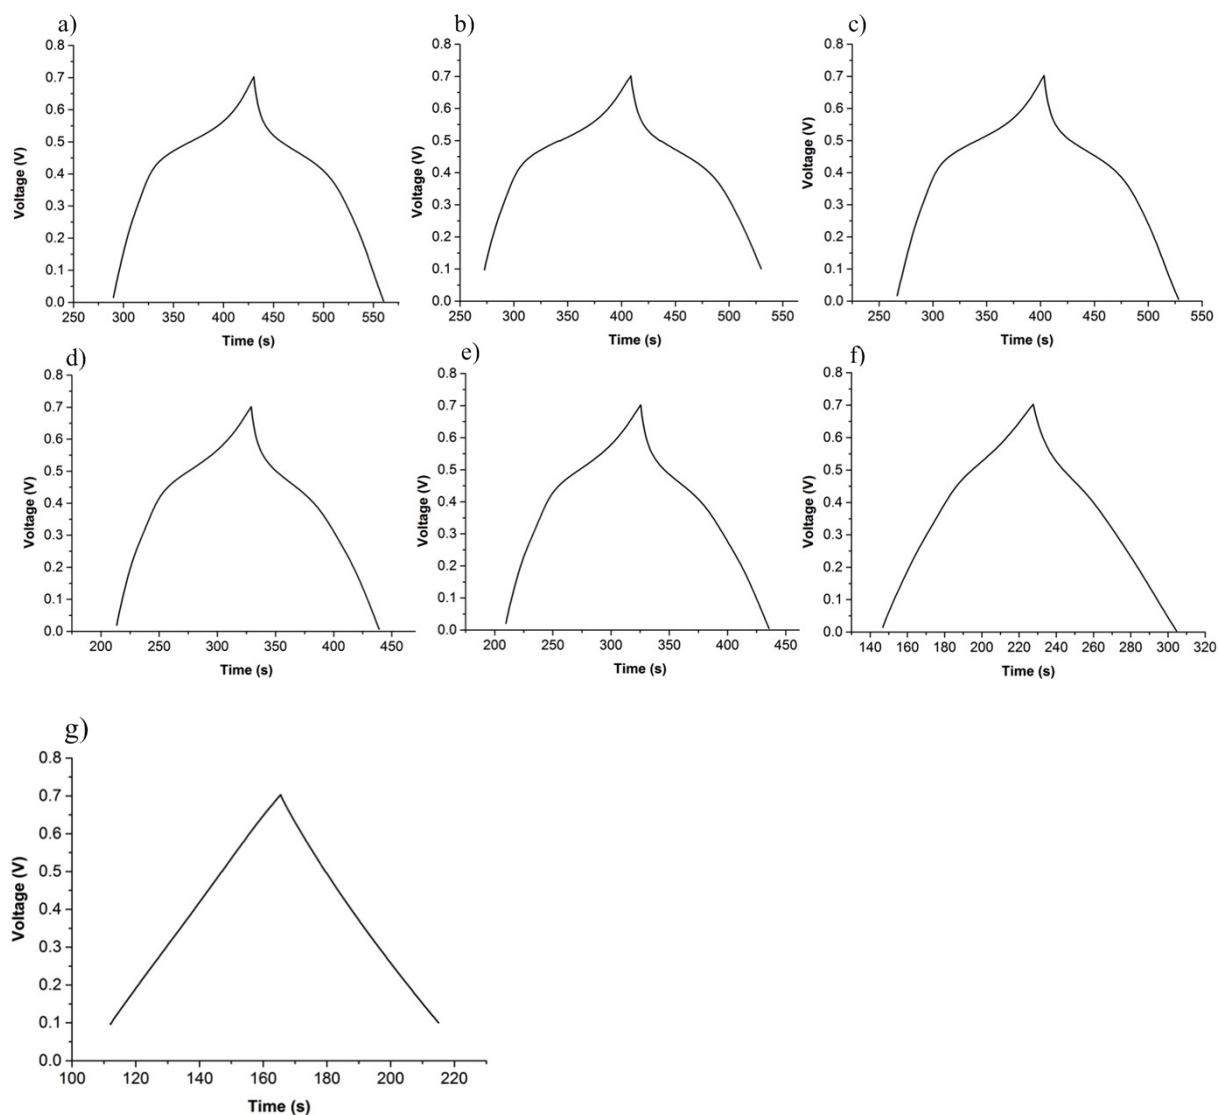

Figure S10. Galvanostatic charge discharge profiles of PEDOT/Lignin composites electrochemically polymerized composites at different deposition times: (a) 300 s; (b) 600 s and (c) 900 s, chemically polymerized with the following EDOT:Lignin mass ratios (d) 3:2; (e) 7:4; (f) 6:1 and (g) PEDOT electrochemically polymerized at current density of  $1 \text{ A g}^{-1}$ .
